# Supplementary material
Source: MDPI journal article supplement (https://www.mdpi.com/2075-4701/10/6/810)
Supplement: s1 [file s1]

Article

# In Situ Time-Resolved Decomposition of $\beta$ -Hydride Phase in Palladium Nanoparticles Coated with Metal-Organic Framework

Mikhail V. Kirichkov <sup>1</sup>, Aram L. Bugaev <sup>1,2,\*</sup>, Alina A. Skorynina <sup>1</sup>, Vera V. Butova <sup>1</sup>, Andriy P. Budnyk <sup>2</sup>, Alexander A. Guda <sup>1</sup>, Alexander L. Trigub <sup>3</sup> and Alexander V. Soldatov <sup>1</sup>

<sup>1</sup> The Smart Materials Research Institute, Southern Federal University, 178/24 Sladkova, 344090 Rostov-on-Don, Russia; kirichkov@sfedu.ru (M.V.K.); skorynina@sfedu.ru (A.A.S.); vbutova@sfedu.ru (V.V.B.); guda@sfedu.ru (A.A.G.); soldatov@sfedu.ru (A.V.S.)

<sup>2</sup> Southern Scientific Centre, Russian Academy of Sciences, 41 Chekhova, 344006 Rostov-on-Don, Russia; abudnik.sfedu@yandex.ru

<sup>3</sup> National Research Centre “Kurchatov Institute”, 1 Akademika Kurchatova pl., 123182 Moscow, Russia; alexander.trigub@gmail.com

\* Correspondence: abugaev@sfedu.ru; Tel.: +7-863-305-1996

## Supporting Information

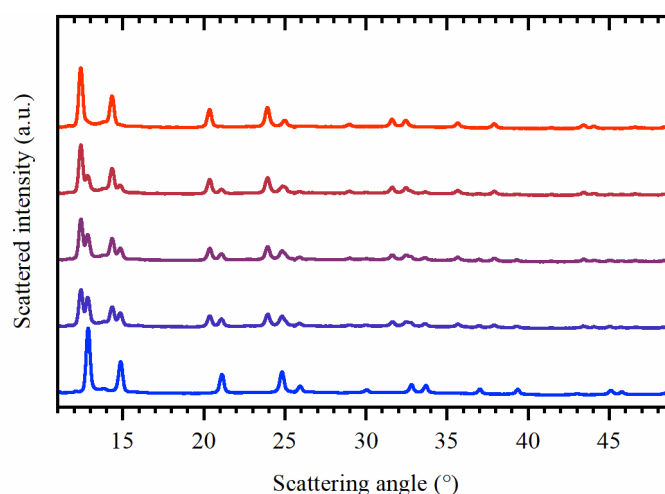

**Figure S1.** In situ XRPD patterns collected with 0.505235 Å radiation during formation of hydride phases Pd@HKUST-1 (from blue to red). The first four spectra are collected within a minute, the last one is after five minutes after sending 2.1 bar hydrogen.

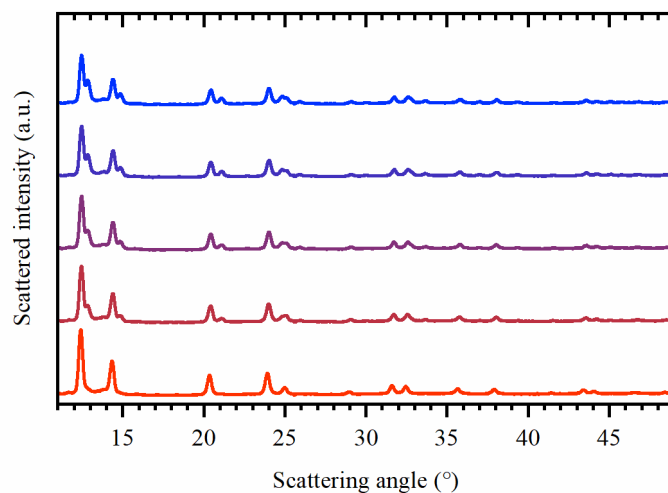

**Figure S2.** XRPD patterns (0.505235 Å radiation) from the first 5 min of the hydrogen desorption from Pd@HKUST-1 reproducing selected data from the whole dataset shown in Figure 4 of the main text. The acquisition time for each pattern was 5 s.

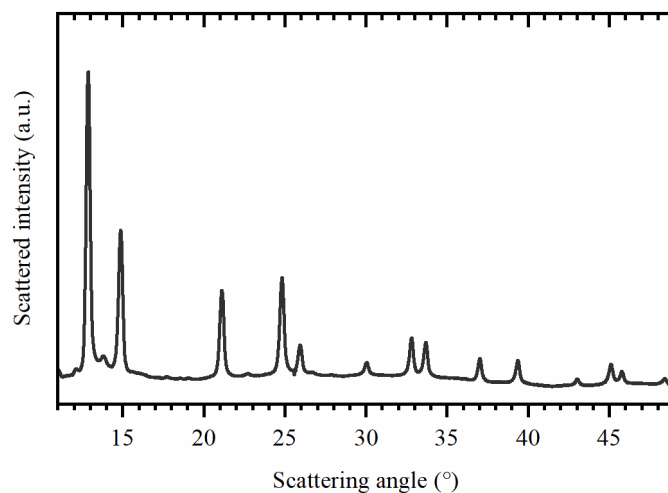

**Figure S3.** XRPD pattern (0.505235 Å radiation) for the Pd@HKUST-1 sample after complete hydrogen desorption at 120 °C.

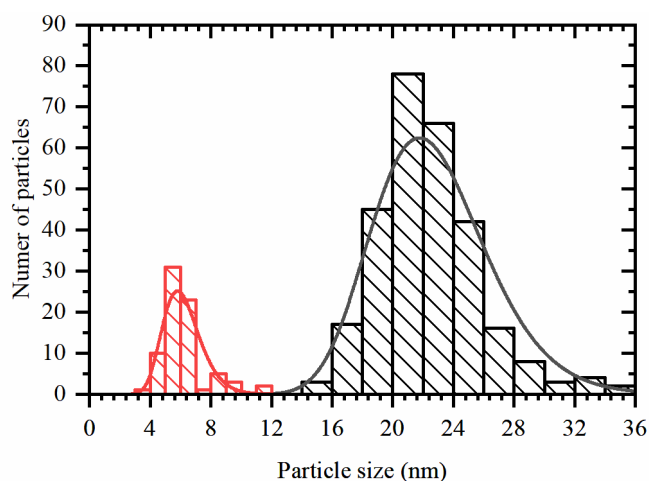

**Figure S4.** TEM distribution of bigger (black) and smaller (red) particles.

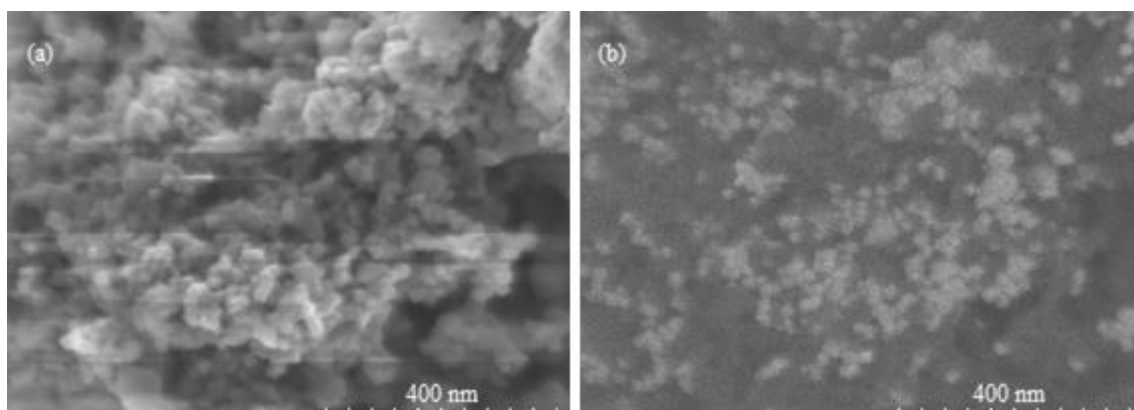

**Figure S5.** SEM image for Pd@HKUST-1 material measured in SE (a) and HA-BSE (b) regimes.

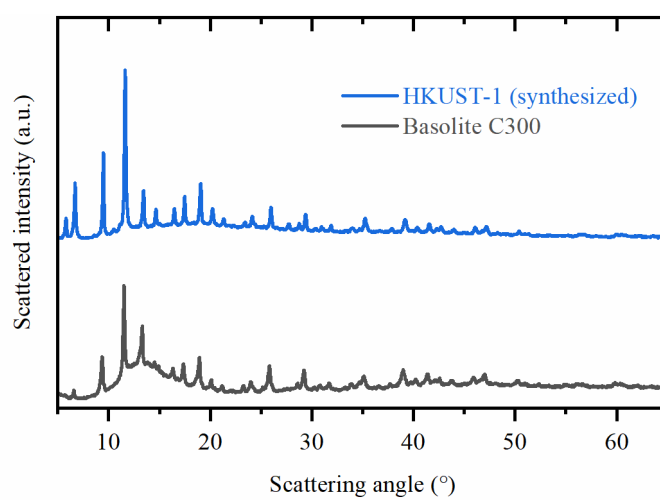

**Figure S6.** XRPD patterns (Cu  $K\alpha$  radiation) for synthesized HKUST-1 (blue) and reference Basolite C300 sample (black).
